# Supplementary material
Source: PubMed Central journal article supplement (PMC3350810)

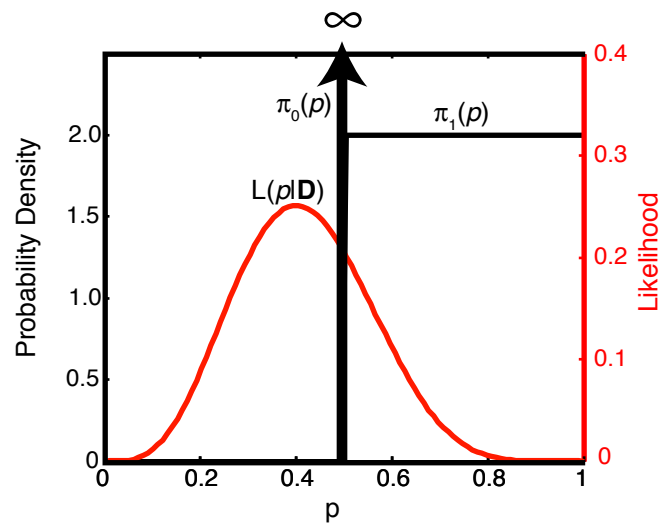

Supplement: NIHMS361969-supplement-03.pdf [file NIHMS361969-supplement-03.pdf]
